# Supplementary material for: What drives political commitment for nutrition? A review and framework synthesis to inform the United Nations Decade of Action on Nutrition
Source: PubMed Central journal article supplement — BMJ Glob Health. 2018 Feb 10;3(1):e000485. doi: 10.1136/bmjgh-2017-000485 (PMC5841521; doi:10.1136/bmjgh-2017-000485), 2018-02-10
Supplement: bmjgh-2017-000485supp002.pdf [file bmjgh-2017-000485supp002.pdf]

## SUPPLEMENTARY TEXT 2: SEARCH DIARY

### Step 1: Database searches

We initially undertook iterative searches of the PubMed, Scopus, ProQuest and ISI Web of Science databases, selected for their relevance and comprehensiveness after consultation with two Australian National University librarians trained in systematic search. Informed by working definitions of malnutrition and political commitment, and theoretical frameworks identified in the literature, we used various combinations of relevant search terms. Search strings were revised through preliminary searches of each database and assessed for specificity and sensitivity. The results of each iteration were reviewed for relevance and comprehensiveness until an optimal search string was identified.

| Database       | Date (by)   | Search string                                                                                                                                                                                                                                                                                                                                                                                                                                                                                                                                                                                                                                                                                                                                                                                                                                                         | Limits applied                                                                                                                                                                                                                    | No. hits – prelim. search | No. hits – final search | Date exported on |
|----------------|-------------|-----------------------------------------------------------------------------------------------------------------------------------------------------------------------------------------------------------------------------------------------------------------------------------------------------------------------------------------------------------------------------------------------------------------------------------------------------------------------------------------------------------------------------------------------------------------------------------------------------------------------------------------------------------------------------------------------------------------------------------------------------------------------------------------------------------------------------------------------------------------------|-----------------------------------------------------------------------------------------------------------------------------------------------------------------------------------------------------------------------------------|---------------------------|-------------------------|------------------|
| PubMed         | 1/8/16 (PB) | (politic* [ti] OR policy [ti] OR policies [ti] OR govern* [ti] OR agenda [ti] OR strateg* [ti] OR commitment [ti] OR priorit* [ti] OR capacit* [ti] OR “enabling environment” [ti] OR accountabilit* [ti] OR advoca* [ti] OR “collective action” [ti] OR stewardship [ti] OR coordination [ti] OR coherence [ti] NOT “research agenda” [ti]) AND (nutrition* [ti] OR undernutrition* [ti] OR under-nutrition [ti] OR overnutrition [ti] OR over-nutrition [ti] OR malnutrition [ti] OR mal-nutrition [ti] OR “micronutrient deficiency” [ti] OR “micronutrient deficiencies” [ti] OR stunting [ti] OR wasting [ti] OR underweight [ti] OR nourish* [ti] OR undernourish* [ti] OR under-nourish* [ti] OR overnourish* [ti] OR over-nourish* [ti] OR malnourish* [ti] OR mal-nourish* [ti] OR hunger [ti] OR overweight [ti] OR obes* [ti] OR diet* [ti] OR food* [ti]) | Publication date from 1/1/1990 to 31/12/2016. English language. Document type: clinical trial, review (this is the default setting). For final search, further restricted to; Humans. Journal article, review, systematic review. | 4,252                     | 2,783                   | 1/8/16           |
| Scopus         |             | (TITLE (politic*) OR TITLE (policy) OR TITLE (policies) OR TITLE (govern*) OR TITLE (agenda) OR TITLE (strateg*) OR TITLE (commitment) OR TITLE (priorit*) OR TITLE (capacit*) OR TITLE (enabling environment) OR TITLE (accountabilit*) OR TITLE (advoca*) OR TITLE (collective action*) OR TITLE (stewardship) OR TITLE (coordination) OR TITLE (coherence) AND NOT TITLE (research agenda)) AND (TITLE (*nutrition*) OR TITLE (micronutrient deficienc*) OR TITLE (stunting) OR TITLE (wasting) OR TITLE (underweight) OR TITLE (*nourish*) OR TITLE (hunger) OR TITLE (overweight) OR TITLE (obes*) OR TITLE (diet*) OR TITLE (food*))                                                                                                                                                                                                                            | Title 1990-present<br>Articles, reviews<br>English<br>Relevant disciplines<br>For final search included environmental sciences                                                                                                    | 4,689                     | 5,268                   | 1/8/16           |
| Web of Science |             | (politic* OR policy OR policies OR govern* OR agenda OR strateg* OR commitment OR priorit* OR capacit* OR “enabling environment” OR accountabilit* OR advoca* OR “collective action” OR stewardship OR coordination OR coherence NOT “research agenda” ) AND (*nutrition* OR “micronutrient deficiency” OR “micronutrient deficiencies” OR                                                                                                                                                                                                                                                                                                                                                                                                                                                                                                                            | Search field: Title.<br>Timespan: 1990-2016.<br>Language: English.<br>Document types: article, review. Research domain: social sciences, arts and                                                                                 | 2,393                     | 2,420                   | 1/8/16           |

|          |  |                                                                                                                                                                                                                                                                                                                                                                                                                                                                                                                                                                                                                                                                      |                                                                                                                                                                                                                                     |       |       |        |
|----------|--|----------------------------------------------------------------------------------------------------------------------------------------------------------------------------------------------------------------------------------------------------------------------------------------------------------------------------------------------------------------------------------------------------------------------------------------------------------------------------------------------------------------------------------------------------------------------------------------------------------------------------------------------------------------------|-------------------------------------------------------------------------------------------------------------------------------------------------------------------------------------------------------------------------------------|-------|-------|--------|
|          |  | stunting OR wasting OR underweight OR *nourish* OR hunger OR overweight OR obes* OR diet* OR food*)                                                                                                                                                                                                                                                                                                                                                                                                                                                                                                                                                                  | humanities. Databases: exclude Medline.                                                                                                                                                                                             |       |       |        |
| ProQuest |  | ti((politic* OR policy OR policies OR govern* OR agenda OR strateg* OR commitment OR priorit* OR capacit* OR “enabling environment” OR accountabilit* OR advoca* OR “collective action” OR stewardship OR coordination OR coherence NOT “research agenda”)) AND ti((nutrition* OR undernutrition* OR under-nutrition* OR overnutrition* OR over-nutrition OR malnutrition* OR mal-nutrition* OR “micronutrient deficiency” OR “micronutrient deficiencies” OR stunting OR wasting OR underweight OR nourish* OR undernourish* OR under-nourish* OR overnourish* OR over-nourish* OR malnourish* OR mal-nourish* OR hunger OR overweight OR obes* OR diet* OR food*)) | Limit to: peer reviewed (tick-box). Filters: English language; date range 1/1/1990-31/12/2016; databases exclude Medline<br><br>*For final search, limited to relevant databases (see list); article, reviews and case studies only | 6,711 | 2,508 | 2/8/16 |

## Step 2: Export results and removal of duplicates

| Date of search | Database       | No. hits exported | No. duplicates | No. after duplicates removed |
|----------------|----------------|-------------------|----------------|------------------------------|
|                | SCOPUS         | 5,268             |                | 4,801                        |
|                | PUBMED         | 2,783             |                | 1,241                        |
|                | WEB OF SCIENCE | 2,420             |                | 753                          |
|                | PROQUEST       | 2,508             |                | 924                          |
|                | TOTAL          | 12,979            | 5,260          | 7,719 → 7,709                |

## Step 3: Screen by title

To reduce the large number of records the research team decided to screen all records by title first. Before proceeding KW + PB screened a 10% sample of records to check for inter-assessor reliability. A number of duplicates were further identified and removed manually, yielding 7,709 articles in total, and a sample size of 771. KW screening resulted in 363 included and 412 excluded articles. PB’s screening resulted in 542 excluded and 232 included. There was a 17% discrepancy equivalent to 155 articles. KW and PB discussed and resolved these discrepancies and it was agreed that 140 articles had been correctly excluded, and 15 articles were incorrectly excluded. This was followed by an in-depth conversation on interpreting the inclusion and exclusion criteria.

This included interpretations of the exclusion criteria: evaluations of nutrition-specific and nutrition-sensitive interventions; 'nutrition strategies' when clearly referring to individual or clinical settings; and policy effects and evaluation (i.e. *for* and not *of* policy). It was decided that studies would be included if referring to institutional food and nutrition policies at the jurisdictional level but not at specific institutions.

PB screened all remaining titles between 15/8/16 and 16/8/16, resulting in 6,274 records being excluded and 1,435 included for screening by abstract.

## Step 4: Screen by abstract

Before proceeding KW + PB screened a 10% sample of 144 records to check for inter-assessor reliability. PB's screening resulted in 109 excluded and 35 included articles. KW's screening resulted in 100 excluded and 44 included. There was a 14% discrepancy equivalent to 20 articles. All discrepancies were resolved through discussion. For 360 articles missing abstracts, these were sourced online via Australian National University Library's SuperSearch tool. PB subsequently screened all remaining abstracts between 29/8/16 and 7/9/16 resulting in 1,279 records being excluded and 175 records included for screening by full text.

#### **Step 5: Screen by full text**

Both KW and PB screened all 175 records by full text between 20/8/16 and 24/9/16. There was a 16% or 28 article discrepancy, with all discrepancies resolved through discussion. It was decided to exclude two main bodies of articles. First, were those that applied multi-criteria mapping (e.g. publications from the PorGrow project) and related methods to assess perceived political feasibility vs. effectiveness of various interventions targeting obesity prevention because although they determined stakeholder positions they did not identify factors that enabled or constrained commitment. Second, were framing analyses on the relationship between public beliefs about obesity and support for policy interventions. These were excluded because they did not directly identify factors that enabled or constrained commitment. Third, were the Landscape Analysis: Country Assessment papers because although these identified each country's readiness to accelerate action on nutrition, they did not elaborate on the determinants of that readiness.

100 records were excluded; 41 did not meet inclusion criterion four and 59 did not meet inclusion criterion five. A total of 62 articles were included in the final list.

#### **Step 6: Grey literature search**

PB conducted the grey literature search on Oct 1 – 2 through a website search of key organizations involved in global nutrition governance (see Morris et al. 2008). Key words were used in the search function of each website. Manual searches of the ELDIS website was also made, particularly those pages on the political economy of nutrition. The websites searched included those of: ELDIS; Food & Agricultural Organizations of the United Nations; Institute for Development Studies; International Food Policy Research Institute; International Fund for Agricultural Development; Oxfam International; Save the Children; Scaling-up Nutrition; United Nations Children's Fund; United Nations Standing Committee on Nutrition; World Bank; World Food Programme; and the World Health Organization. A total of 17 documents were identified. KW and PB independently screened these documents between 3/10/16 and 7/10/16. There were no discrepancies and 11 grey literature texts were included in the final list.

#### **Step 7: Additional search**

To capture articles published in the months immediately following the initial search a further search of the same databases was conducted. This identified two additional articles.

#### **Step 8: Collation and final approval by review team**

A total of 75 articles were included in the final full list. This list was circulated among all team members for final approval.
